# Supplementary material for: Accurately manipulating hierarchical flower-like Fe2P@CoP@nitrogen-doped carbon spheres as an efficient carrier material of Pt-based catalyst
Source: Royal Society of Chemistry journal article supplement (doi:10.1039/d1nr05101f), 2021-01-01
Supplement: d1nr05101f1.pdf [file d1nr05101f1.pdf]

## Supporting material

### **Accurately manipulating hierarchical flower-like Fe<sub>2</sub>P@CoP@nitrogen-doped carbon spheres as an efficient carrier material of Pt-based catalyst**

*Fei Xie, Mengyu Gan\* and Li Ma\*\**

*College of Chemistry & Chemical Engineering, Chongqing University, Chongqing*

*400044, P. R. China*

---

\*Corresponding author. E-mail address: mlsys404@126.com.

\*\*Corresponding author. E-mail address: mlsys607@126.com.

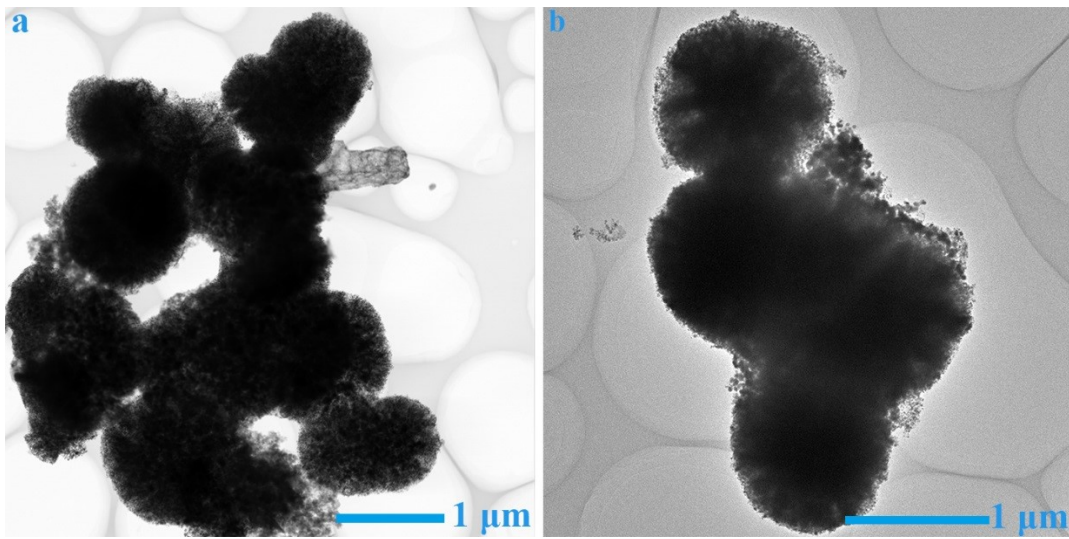

**Fig. S1** TEM images of  $\text{Fe}_2\text{P}@CoP@NDC$

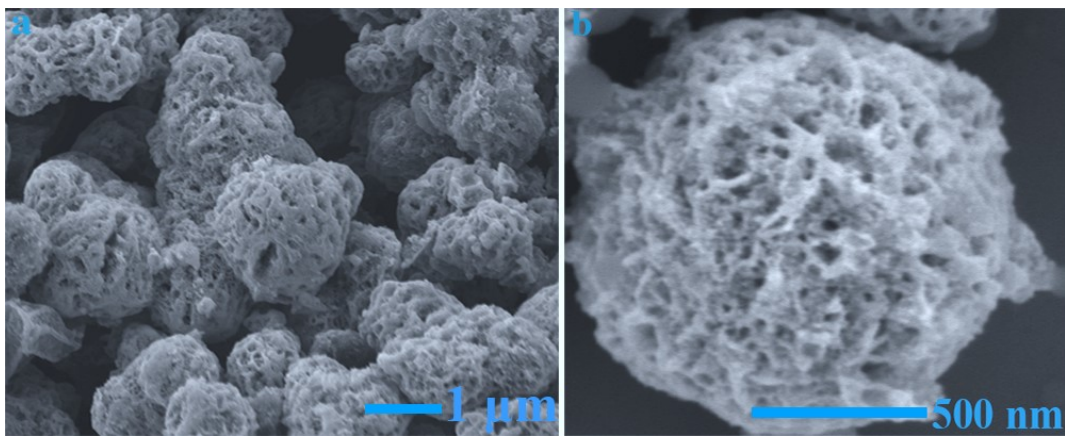

**Fig. S2** SEM images of  $\text{Pt}/\text{Fe}_2\text{P}@CoP@NDC$  porous spheres.

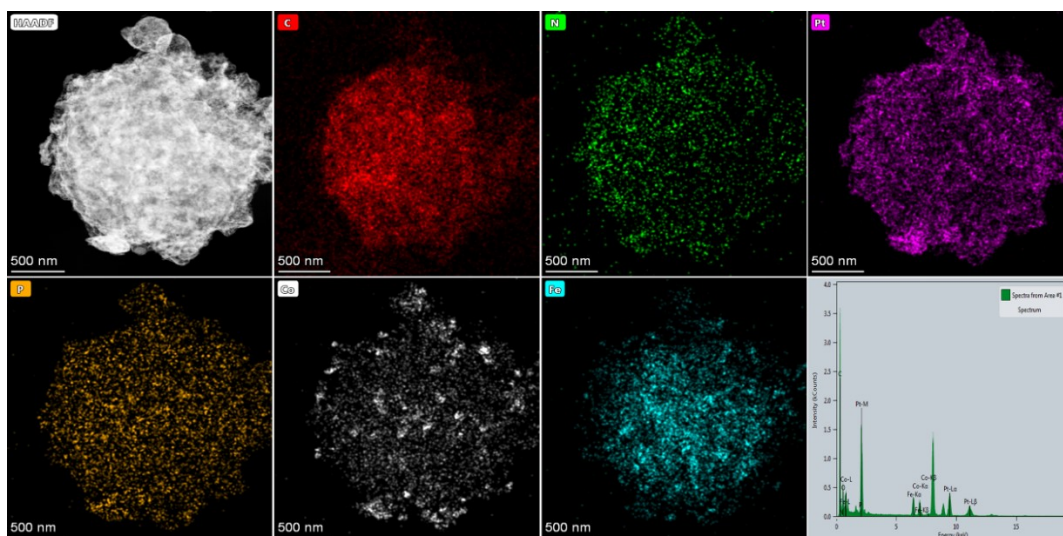

**Fig. S3** EDS mapping images of Pt/Fe<sub>2</sub>P@CoP@NDC porous spheres.

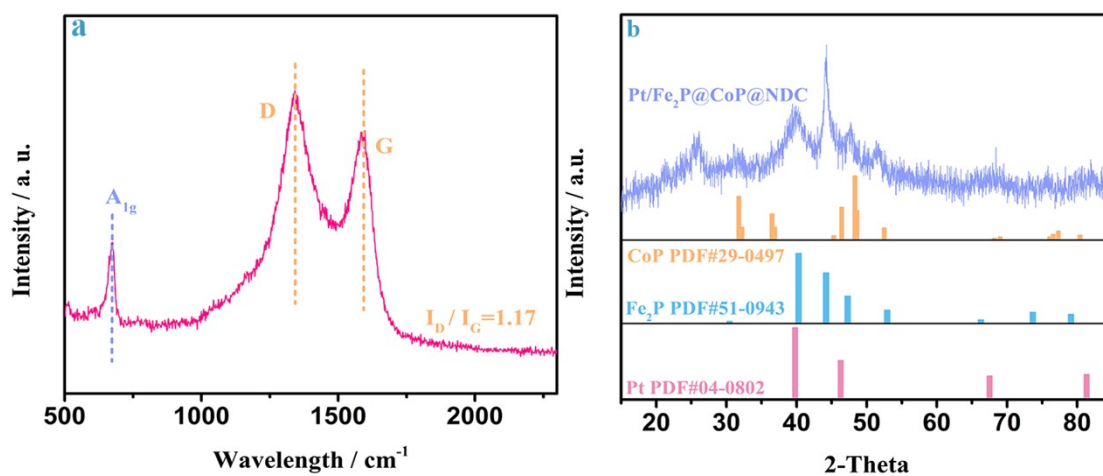

**Fig. S4** Raman spectrum (a) of flower-like Fe<sub>2</sub>P@CoP@NDC spheres, XRD pattern (b) of Pt/Fe<sub>2</sub>P@CoP@NDC porous spheres.

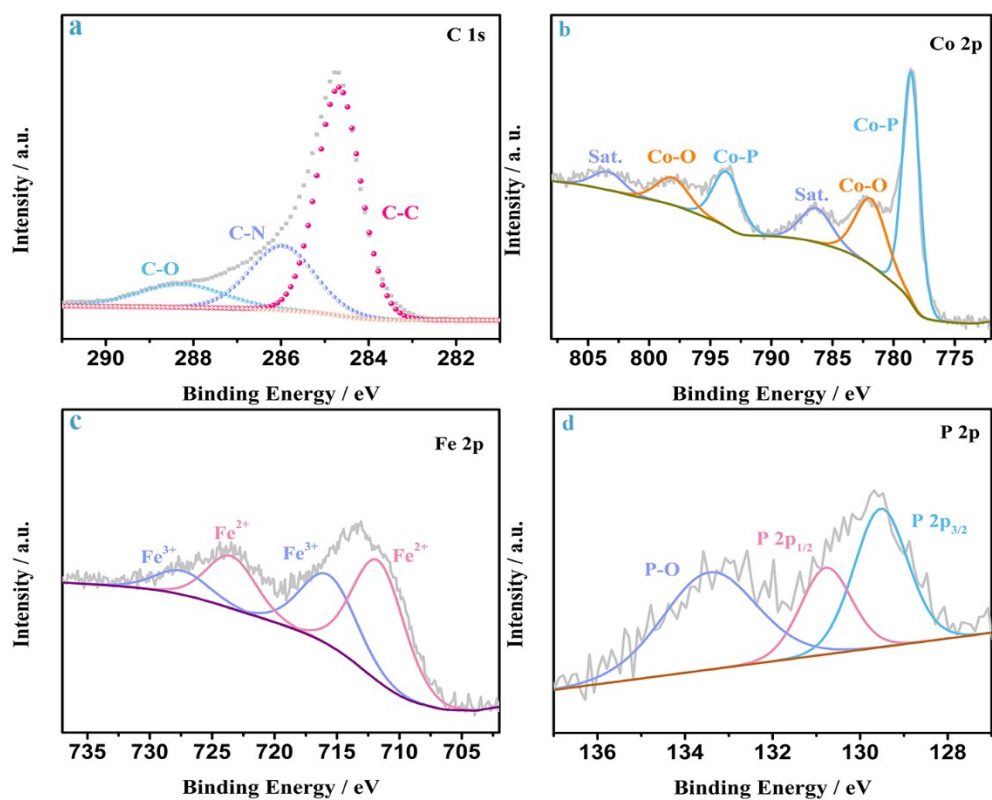

Fig. S5 XPS spectra of C 1s (a), Co 2p (b), Fe (c) and P 2p (d) for Pt/Fe<sub>2</sub>P@CoP@NDC porous spheres.

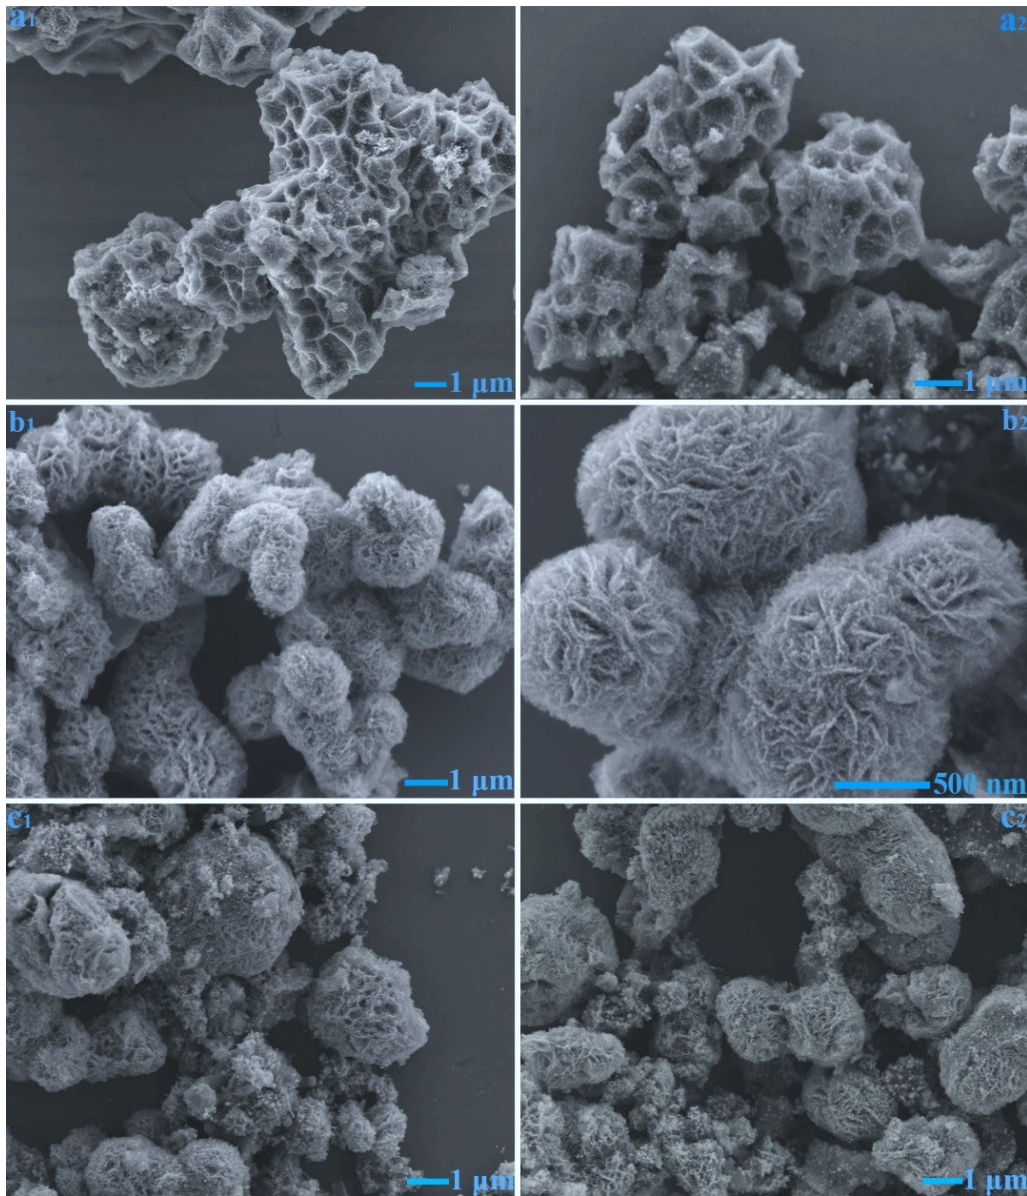

Fig. S6 SEM images of  $\text{Fe}_2\text{P}@CoP@NDC$  at different reaction times: 6 h (a), 12 h (b), 18 h (c).

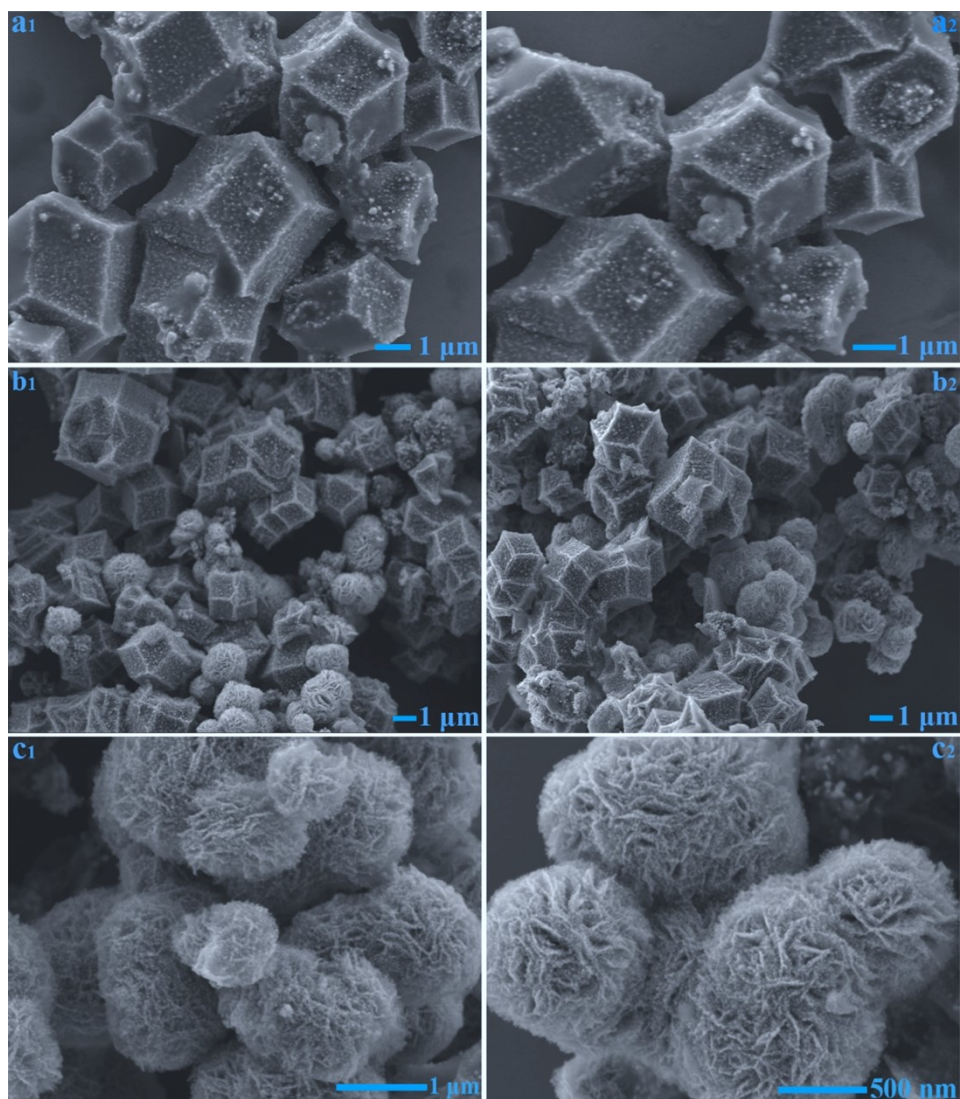

**Fig. S7** SEM images of Fe<sub>2</sub>P@CoP@NDC at different amount of PVP: 0 g (a), 0.2 g (b), 0.4 g (c).

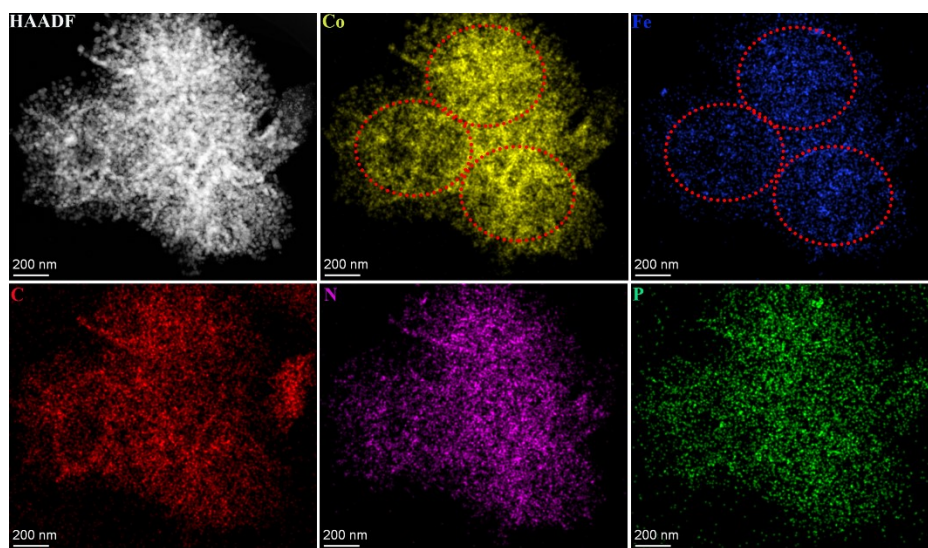

**Fig. S8** EDS mapping images of Fe<sub>2</sub>P@CoP@NDC

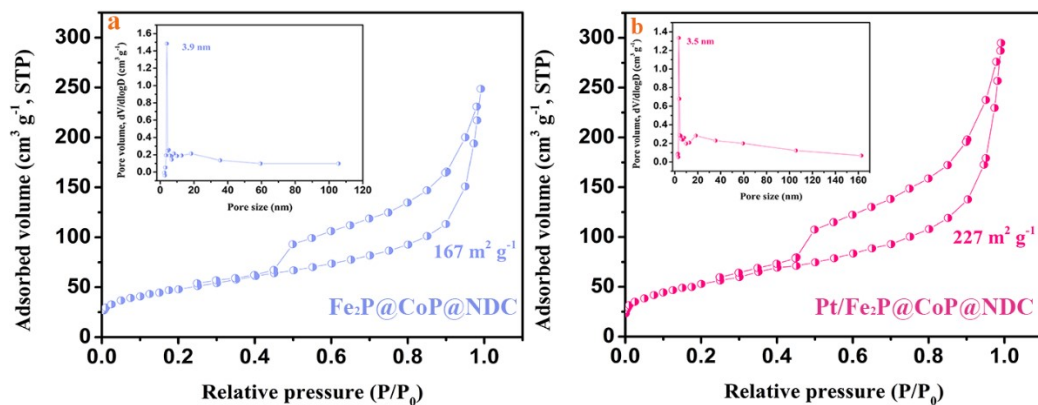

Fig. S9 Nitrogen adsorption/desorption isotherms of  $\text{Fe}_2\text{P@CoP@NDC}$  (a) and  $\text{Pt/Fe}_2\text{P@CoP@NDC}$  (b).

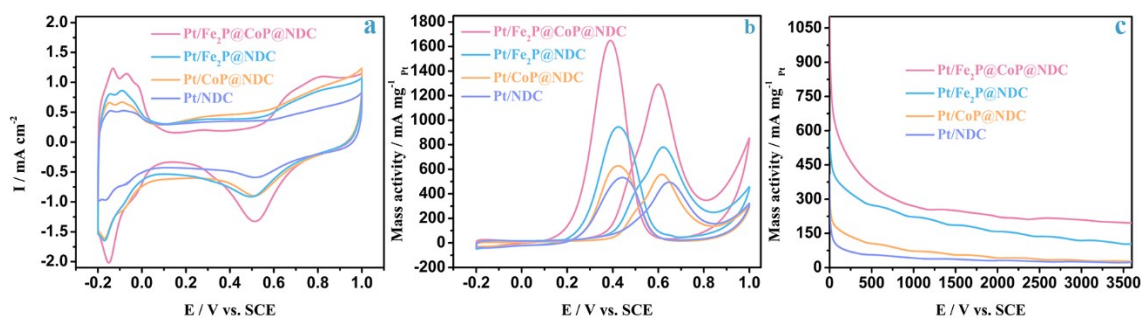

Fig. S10 CV curves (a), mass activity (b) and chronoamperometric curves (c) of  $\text{Pt/Fe}_2\text{P@CoP@NDC}$ ,  $\text{Pt/Fe}_2\text{P@NDC}$ ,  $\text{Pt/CoP@NDC}$  and  $\text{Pt/NDC}$  catalysts.

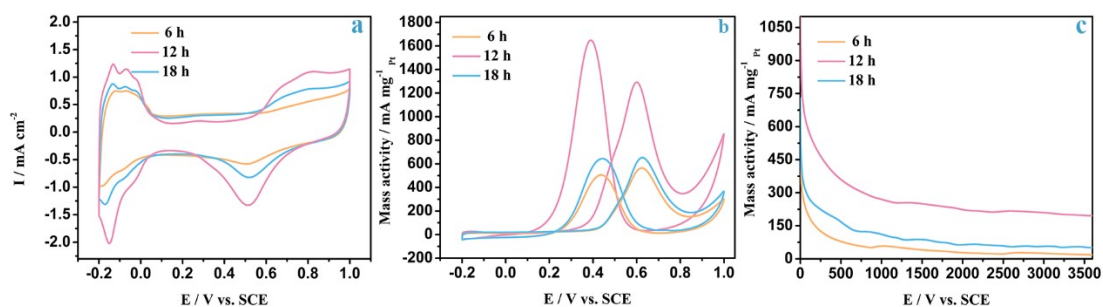

Fig. S11 CV curves (a), mass activity (b) and chronoamperometric curves (c) of  $\text{Pt/Fe}_2\text{P@CoP@NDC}$  catalyst at different reaction time: 6h, 12h and 18h.

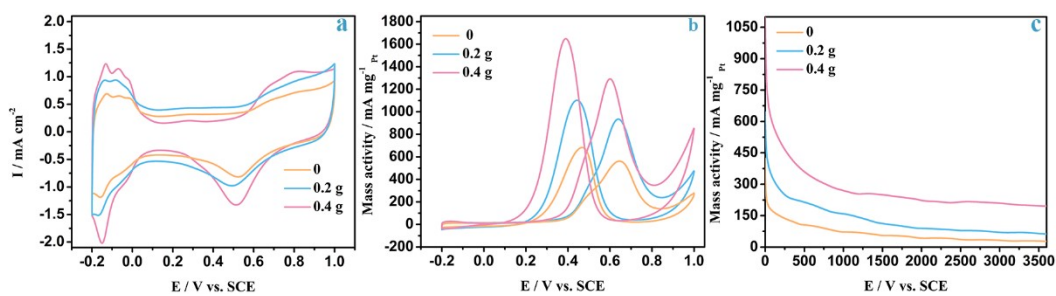

**Fig. S12** CV curves (a), mass activity (b) and chronoamperometric curves (c) of Pt/Fe<sub>2</sub>P@CoP@NDC catalyst at different amount of PVP: 0 g, 0.2 g, 0.4 g.

**Table S1** The exact amount of metal in the Pt/Fe<sub>2</sub>P@CoP@NDC and commercial Pt/C catalysts obtained by ICP-OES.

| Samples                      | Pt amount / wt% | Fe amount / wt% | Co amount / wt% |
|------------------------------|-----------------|-----------------|-----------------|
| Pt/Fe <sub>2</sub> P@CoP@NDC | 18.97           | 13.26           | 11.92           |
| Commercial Pt/C              | 20              | /               | /               |

**Table S2** Relative content of three types Pt for Pt/Fe<sub>2</sub>P@CoP@NDC and commercial Pt/C catalysts.

| Samples                      | Pt <sup>0</sup>     |         | Pt <sup>2+</sup>    |         | Pt <sup>4+</sup>    |         |
|------------------------------|---------------------|---------|---------------------|---------|---------------------|---------|
|                              | Binding energy / eV | Ratio % | Binding energy / eV | Ratio % | Binding energy / eV | Ratio % |
| Pt/Fe <sub>2</sub> P@CoP@NDC | 71.35               | 70.32   | 72.45               | 18.67   | 73.84               | 11.01   |
|                              | 74.75               |         | 75.96               |         | 77.48               |         |
| Commercial Pt/C              | 71.45               | 61.33   | 72.57               | 26.21   | 74.20               | 12.46   |
|                              | 74.85               |         | 75.97               |         | 77.55               |         |
